# Supplementary material
Source: PubMed Central journal article supplement (PMC1317588)
Supplement: jbacter_188_1_223__1.pdf [file jbacter_188_1_223__1.pdf]

**Supplementary Material** to “The AidB Component of the *Escherichia coli* Adaptive Response to Alkylating Agents is a Flavin-Containing, DNA-Binding Protein” by Mukta S. Rohankhedkar, Scott B. Mulrooney, William J. Wedemeyer, and Robert P. Hausinger.

Figure S1. Consensus of secondary-structure predictions from the PsiPred (3, 6), SAM-T2K (4), SABLE2 (1), and PROFsec (7) servers, the four best-validated methods (5). Results are shown for only the C-terminal domain (residues 441-541) of AidB; red and blue indicate high and low probability, respectively, while the magenta bars at the bottom of each section indicate every tenth residues. These predictions are consistent with the hypothesis that the C-terminal domain adopts a four-helix bundle similar to that seen in the 1IS2 structure.

Figure S2. Alignment of 34 non-redundant, full-length homologs of AidB. Absolutely conserved residues are indicated in red, whereas conserved residues are indicated in yellow. The residue numbering at the top is taken from AidB. This Figure was produced with the ESPript server (2).

1. **Adamczak, R., A. Porollo, and J. Meller.** 2005. Combining prediction of secondary structure and solvent accessibility in proteins. *Proteins: Structure, Function, and Genetics* **59**:467-475.
2. **Gouet, P., E. Courcelle, D. I. Stuart, and F. Metoz.** 1999. ESPript: Multiple sequence alignments in PostScript. *Bioinformatics* **15**:305-308.
3. **Jones, D. T.** 1999. Protein secondary structure prediction based on position-specific scoring matrices. *Journal of Molecular Biology* **292**:195-202.
4. **Karplus, K., R. Karchin, C. Barrett, S. Tu, M. Cline, M. Diekhans, L. Grate, J. Casper, and R. Hughey.** 2001. What is the value added by human intervention in protein structure prediction? *Suppl.* 5.
5. **Koh, I. Y. Y., V. A. Eylich, M. A. Marti-Renom, D. Przybylski, M. S. Madhusudhan, N. Eswar, O. Grana, F. Pazos, A. Valencia, A. Sali, and B. Rost.** 2003. EVA: evaluation of protein structure prediction servers. *Nucleic Acids Research* **31**:3311-3315.
6. **McGuffin, L. J., K. Bryson, and D. T. Jones.** 2000. The PSIPRED protein structure prediction server. *Bioinformatics* **16**:404-405.
7. **Rost, B.** 2001. Review: Protein secondary structure prediction continues to rise. *Journal of Structural Biology* **134**:204-218.

Figure S1

### AidB\_441\_541

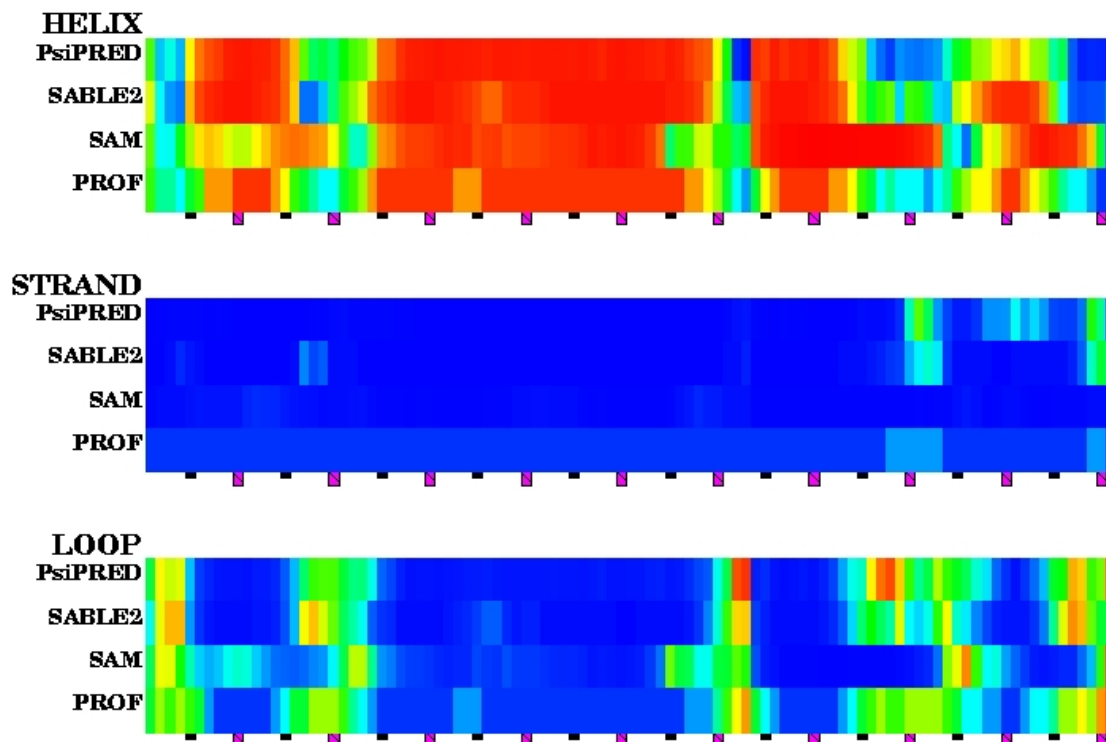

Figure S2

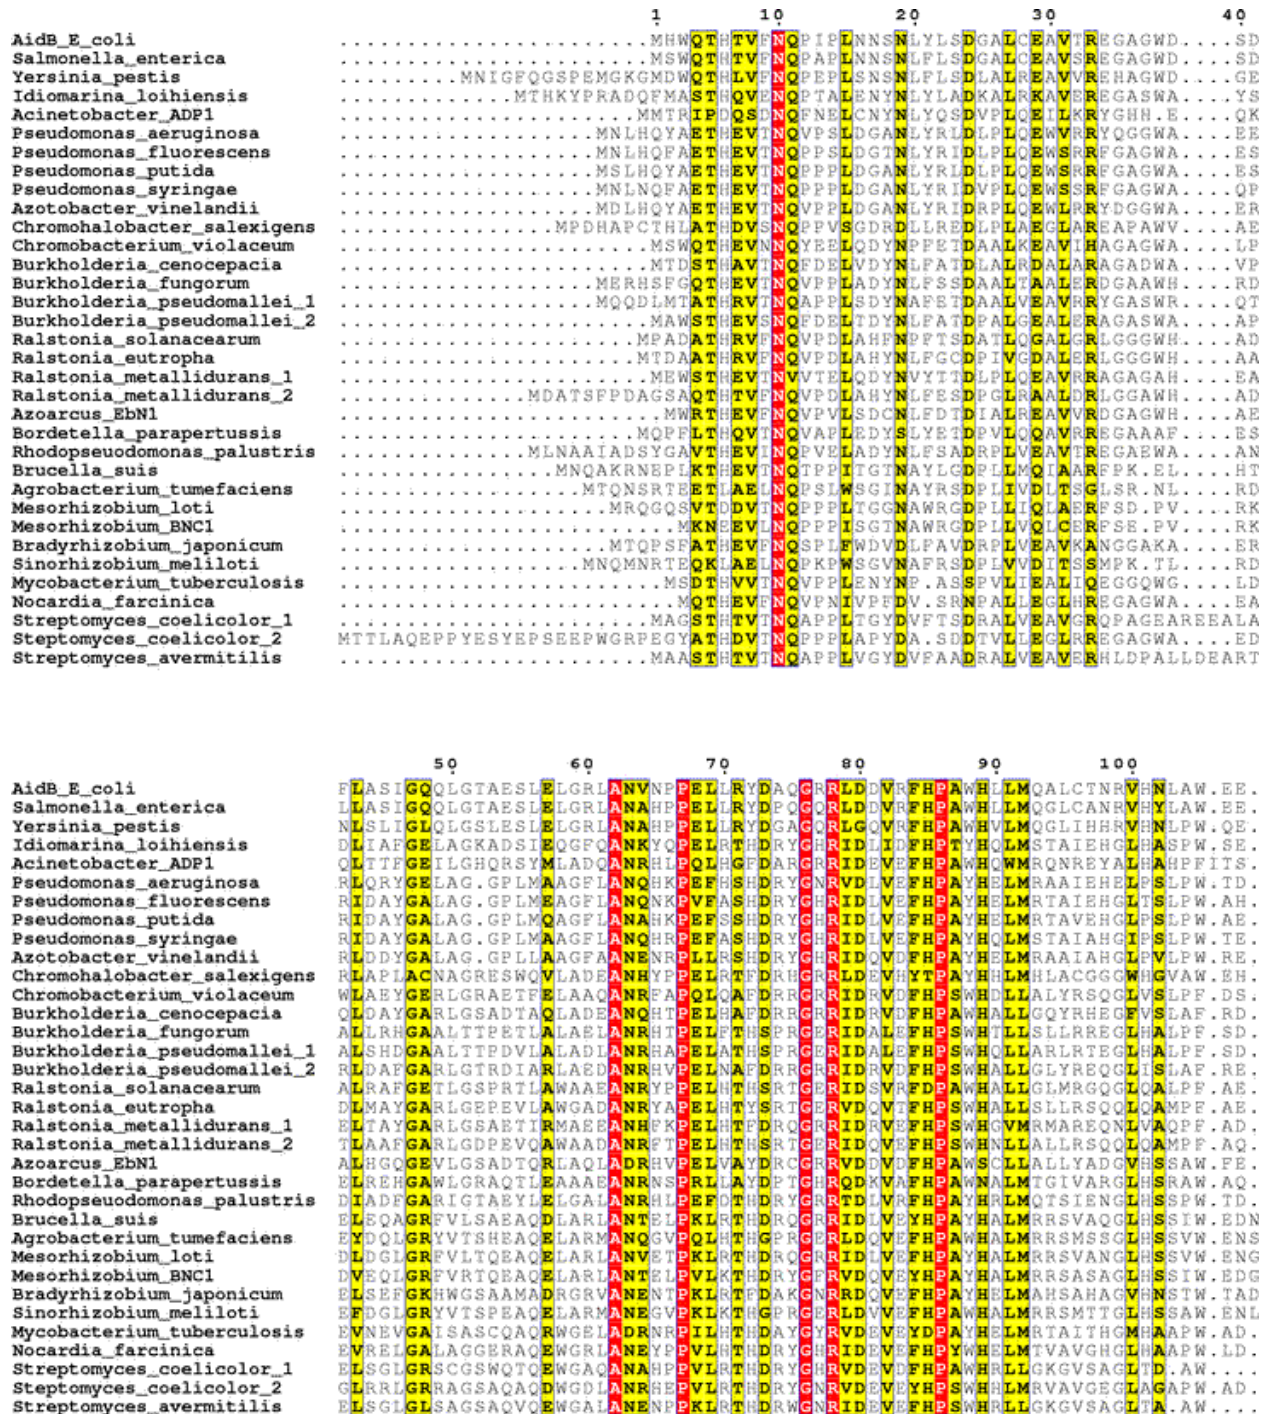

|                             | 110    | 120      | 130     | 140     | 150    | 160     |          |          |          |      |
|-----------------------------|--------|----------|---------|---------|--------|---------|----------|----------|----------|------|
| AidB_E.coli                 | .DARS  | GNFVARAA | RFLHA   | QVEAGSI | CPITMT | FAATPLL | QMLPA... | PFQDWTTE | ELSDRYD  | SHL  |
| Salmonella_enterica         | .EARA  | GSFVARAA | RFVLA   | QVEAGTI | CPVTMT | FAATPLL | QMLPA... | TFHDWLAP | ELSDRYD  | SHL  |
| Yersinia_pestis             | .DARN  | GSFVARAA | RFVLA   | QVDAGAL | CPITMT | FAATPLL | QMLPA... | TFQNWLS  | ELSDRYD  | PHL  |
| Idiomarina_loihiensis       | ..PKL  | GAHVARAA | KYLLT   | QVEASHG | CPITMT | FAATPLL | QMLPA... | LFKEWGP  | KILARQYD | PRN  |
| Acinetobacter_ADPl          | ..AAQ  | TGWVEWAA | RFYLS   | QVESSGI | CPSAMT | FGSIL   | QRESK... | LWQTLGK  | KLLSCDYD | ERD  |
| Pseudomonas_aeruginosa      | ..PRP  | GAQVARAG | LSYLS   | QAEAGTG | CPLTMT | FAAVPAL | RLQPN... | LAEKWLP  | KILSREYD | PRN  |
| Pseudomonas_fluorescens     | ..PQD  | GAHVARAS | MSYLS   | QAEAGSG | CPLTMT | FAAVPAL | RLQPN... | LAEHWLP  | KILATEYD | PRN  |
| Pseudomonas_putida          | ..PRA  | GAHVARAS | MYLS    | QAEAGTG | CPLTMT | FAAVPAL | RLQPN... | LAEYWLP  | KILACEYD | PRN  |
| Pseudomonas_syringae        | ..POP  | GAHVARAA | MSYLT   | QAEAGSG | CPLTMT | FAAVPAL | RLQPN... | LAEYWLP  | KILSTEYD | PRN  |
| Azotobacter_vinelandii      | ..PRP  | GAQVARAG | LMYLN   | QVEAGTA | CPLTMT | FAAVPAL | RLQPN... | LAESWLP  | RVLAGEYD | PRN  |
| Chromohalobacter_salexigens | ..EGA  | GGQAHIA  | AALYLLT | QVEPGFC | CPITMT | FAAVPAL | RLQPN... | LFATWGP  | RLLAHDYD | PRA  |
| Chromobacterium_violaceum   | ..ERP  | GRWAFLA  | GFYLG   | QVEAGTL | CPATMT | FAAVPAL | RLQPN... | LFADLGP  | RLLSREHD | DARD |
| Burkholderia_cenocepacia    | ..PRR  | GRWAATA  | AGFYLG  | QVEAGTI | CPATMT | FAAVPAL | RLQPN... | LWDLRLK  | LYLSDDYD | PRD  |
| Burkholderia_fungorum       | ..PQR  | GAMVARCA | GYFLHA  | QIESGSI | CPLTMT | FAAVPAL | RLQPN... | LFARLRD  | KLYAREHD | PRD  |
| Burkholderia_pseudomallei_1 | ..PRP  | GAMAARCA | GYFLHA  | QIESGSI | CPLTMT | FAAVPAL | RLQPN... | LFATLRD  | KLYAREHD | DARD |
| Burkholderia_pseudomallei_2 | ..SRA  | GRWAANA  | AGFYLG  | QIEAGTI | CPITMT | FAAVPAL | RLQPN... | LFADLGP  | RLLSREHD | PRD  |
| Ralstonia_solanacearum      | ..PRA  | GAWAART  | AGYFMA  | QIESGSI | CPATMT | FAAVPAL | RLQPN... | LFADLGP  | RLLSREHD | DARD |
| Ralstonia_eutropha          | ..PRA  | GAWIART  | AGYFLQ  | QVESGSI | CPITMT | FAAVPAL | RLQPN... | LFADLGP  | RLLSREHD | DARD |
| Ralstonia_metallidurans_1   | ..PRP  | GAWAAYA  | AGFSMH  | QIEAGSQ | CPNSMT | FAAVPAL | RLQPN... | LFADLGP  | RLLSREHD | DARD |
| Ralstonia_metallidurans_2   | ..PRP  | GVWAART  | GYFLQ   | QVESGSI | CPLTMT | FAAVPAL | RLQPN... | LFADLGP  | RLLSREHD | DARD |
| Azoarcus_EbN1               | ..PRP  | GAHVARAA | SFFLH   | QAEAGSI | CPVTMT | FAAVPAL | RLQPN... | LFADLGP  | RLLSREHD | GRD  |
| Bordetella_parapertussis    | ..PVP  | GAHVARAA | AYLMG   | QVEAGTI | CPITMT | FAAVPAL | RLQPN... | LFADLGP  | RLLSREHD | DARD |
| Rhodopseudomonas_palustris  | ..PRK  | GAHVARAA | RFYLS   | QIEAGTI | CPITMT | FAAVPAL | RLQPN... | LFADLGP  | RLLSREHD | DARD |
| Brucella_suis               | PLESG  | RRHQARA  | AFYLT   | QIEAGTI | CPLTMT | FAAVPAL | RLQPN... | LFADLGP  | RLLSREHD | DARD |
| Agrobacterium_tumefaciens   | PDTRG  | SEHKARAT | KFYLLT  | QIEAGTI | CPLTMT | FAAVPAL | RLQPN... | LFADLGP  | RLLSREHD | DARD |
| Mesorhizobium_loti          | DAEIG  | RRHQARA  | AFYLT   | QIEAGTI | CPITMT | FAAVPAL | RLQPN... | LFADLGP  | RLLSREHD | DARD |
| Mesorhizobium_BNCl          | EDEKG  | QRHQARA  | AFYLT   | QIEAGTI | CPMTMT | FAAVPAL | RLQPN... | LFADLGP  | RLLSREHD | DARD |
| Bradyrhizobium_japonicum    | GKPAAD | AAEVIRAA | KFYIAS  | QVETGHL | CPITMT | FAAVPAL | RLQPN... | LFADLGP  | RLLSREHD | DARD |
| Sinorhizobium_meliloti      | PDERG  | RSHKVRA  | RFYLT   | QIEAGTI | CPLTMT | FAAVPAL | RLQPN... | LFADLGP  | RLLSREHD | DARD |
| Mycobacterium_tuberculosis  | ..DRP  | GAHVVRA  | AFYLS   | QIEAGTI | CPISMT | FAAVPAL | RLQPN... | LFADLGP  | RLLSREHD | DARD |
| Nocardia_farcinica          | ..ERP  | GAHVARAA | KFYTW   | QAEAGSI | CPISMT | FAAVPAL | RLQPN... | LFADLGP  | RLLSREHD | DARD |
| Streptomyces_coelicolor_1   | ..SRP  | GGVRAAA  | AGFLMT  | QVEAGSI | CPLTMT | FAAVPAL | RLQPN... | LFADLGP  | RLLSREHD | DARD |
| Streptomyces_coelicolor_2   | ..GRP  | GAHVART  | AGFLV   | QIEAGSI | CPLTMT | FAAVPAL | RLQPN... | LFADLGP  | RLLSREHD | DARD |
| Streptomyces_avermitilis    | ..SRP  | GGVRAAA  | GFVLT   | QAEAGSI | CPLTMT | FAAVPAL | RLQPN... | LFADLGP  | RLLSREHD | DARD |

|                             | 170    | 180    | 190  | 200    | 210      | 220    |       |    |       |       |       |         |
|-----------------------------|--------|--------|------|--------|----------|--------|-------|----|-------|-------|-------|---------|
| AidB_E.coli                 | LPGGCK | RGLLIG | MGMT | TEKQGG | SDVLSNTT | RAERLE | ..... | DG | SYRLV | GHWFF | SVFQS | DAHLVLA |
| Salmonella_enterica         | LPGGCK | RGLLIG | MGMT | TEKQGG | SDVLSNTT | RAERLE | ..... | DD | SYRLV | GHWFF | SVFQS | DAHLVLA |
| Yersinia_pestis             | SLGNCK | RGLLIG | MGMT | TEKQGG | SDVLSNTT | RAERLE | ..... | GQ | SYRLV | GHWFF | SVFQS | DAHLVLA |
| Idiomarina_loihiensis       | IPHTER | SAVTIG | MGMT | TEKQGG | SDVLSNTT | RAERLE | ..... | GS | SYRLV | GHWFF | SVFQS | DAHLVLA |
| Acinetobacter_ADPl          | ILISCK | SIWVIG | MGMT | TEKQGG | SDVLSNTT | RAERLE | ..... | GR | SYRLV | GHWFF | SVFQS | DAHLVLA |
| Pseudomonas_aeruginosa      | VPMECK | AGVTIG | MGMT | TEKQGG | SDVLSNTT | RAERLE | ..... | GP | SYRLV | GHWFF | SVFQS | DAHLVLA |
| Pseudomonas_fluorescens     | VGMAHK | AGVTIG | MGMT | TEKQGG | SDVLSNTT | RAERLE | ..... | GP | SYRLV | GHWFF | SVFQS | DAHLVLA |
| Pseudomonas_putida          | VGDRHK | AGVTIG | MGMT | TEKQGG | SDVLSNTT | RAERLE | ..... | GP | SYRLV | GHWFF | SVFQS | DAHLVLA |
| Pseudomonas_syringae        | VGIAHK | AGVTIG | MGMT | TEKQGG | SDVLSNTT | RAERLE | ..... | GP | SYRLV | GHWFF | SVFQS | DAHLVLA |
| Azotobacter_vinelandii      | LFVERK | GGATL  | MGMT | TEKQGG | SDVLSNTT | RAERLE | ..... | GP | SYRLV | GHWFF | SVFQS | DAHLVLA |
| Chromohalobacter_salexigens | LPAGCK | RAATL  | MGMT | TEKQGG | SDVLSNTT | RAERLE | ..... | DG | SYRLV | GHWFF | SVFQS | DAHLVLA |
| Chromobacterium_violaceum   | LPAERK | TAIWL  | MGMT | TEKQGG | SDVLSNTT | RAERLE | ..... | GR | SYRLV | GHWFF | SVFQS | DAHLVLA |
| Burkholderia_cenocepacia    | VPVADK | RAIWF  | MGMT | TEKQGG | SDVLSNTT | RAERLE | ..... | GR | SYRLV | GHWFF | SVFQS | DAHLVLA |
| Burkholderia_fungorum       | VPLTHK | NSAMIG | MGMT | TEKQGG | SDVLSNTT | RAERLE | ..... | GR | SYRLV | GHWFF | SVFQS | DAHLVLA |
| Burkholderia_pseudomallei_1 | APLPCK | RSMMV  | MGMT | TEKQGG | SDVLSNTT | RAERLE | ..... | GR | SYRLV | GHWFF | SVFQS | DAHLVLA |
| Burkholderia_pseudomallei_2 | APIGAR | QSIMI  | MGMT | TEKQGG | SDVLSNTT | RAERLE | ..... | GR | SYRLV | GHWFF | SVFQS | DAHLVLA |
| Ralstonia_solanacearum      | LPWRCK | TAILV  | MGMT | TEKQGG | SDVLSNTT | RAERLE | ..... | GR | SYRLV | GHWFF | SVFQS | DAHLVLA |
| Ralstonia_eutropha          | LPWRCK | TAILV  | MGMT | TEKQGG | SDVLSNTT | RAERLE | ..... | GR | SYRLV | GHWFF | SVFQS | DAHLVLA |
| Ralstonia_metallidurans_1   | IPLECK | DSILV  | MGMT | TEKQGG | SDVLSNTT | RAERLE | ..... | GR | SYRLV | GHWFF | SVFQS | DAHLVLA |
| Ralstonia_metallidurans_2   | LPWRCK | TAVMI  | MGMT | TEKQGG | SDVLSNTT | RAERLE | ..... | GR | SYRLV | GHWFF | SVFQS | DAHLVLA |
| Azoarcus_EbN1               | VPLACK | RSAMI  | MGMT | TEKQGG | SDVLSNTT | RAERLE | ..... | SR | DHLLV | GHWFF | SVFQS | DAHLVLA |
| Bordetella_parapertussis    | APIGRK | RGALI  | MGMT | TEKQGG | SDVLSNTT | RAERLE | ..... | GR | SYRLV | GHWFF | SVFQS | DAHLVLA |
| Rhodopseudomonas_palustris  | VPAECK | QGITL  | MGMT | TEKQGG | SDVLSNTT | RAERLE | ..... | GP | SYRLV | GHWFF | SVFQS | DAHLVLA |
| Brucella_suis               | KPAFRK | QGVTL  | MGMT | TEKQGG | SDVLSNTT | RAERLE | ..... | GC | AWRLT | GHWFF | SVFQS | DAHLVLA |
| Agrobacterium_tumefaciens   | KPALCK | TAVIV  | MGMT | TEKQGG | SDVLSNTT | RAERLE | ..... | EG | IYRLT | GHWFF | SVFQS | DAHLVLA |
| Mesorhizobium_loti          | KPPVEK | ETGLT  | MGMT | TEKQGG | SDVLSNTT | RAERLE | ..... | SG | FYRLT | GHWFF | SVFQS | DAHLVLA |
| Mesorhizobium_BNCl          | RPAACK | QGVTL  | MGMT | TEKQGG | SDVLSNTT | RAERLE | ..... | EG | LYRLT | GHWFF | SVFQS | DAHLVLA |
| Bradyrhizobium_japonicum    | APWCK  | RGMTL  | MGMT | TEKQGG | SDVLSNTT | RAERLE | ..... | D  | AYRIT | GHWFF | SVFQS | DAHLVLA |
| Sinorhizobium_meliloti      | RPWCK  | SAVTL  | MGMT | TEKQGG | SDVLSNTT | RAERLE | ..... | EG | IYRLT | GHWFF | SVFQS | DAHLVLA |
| Mycobacterium_tuberculosis  | KPATCK | KAGIT  | MGMT | TEKQGG | SDVLSNTT | RAERLE | ..... | G  | SYSLT | GHWFF | SVFQS | DAHLVLA |
| Nocardia_farcinica          | REPTEK | AGLIA  | MGMT | TEKQGG | SDVLSNTT | RAERLE | ..... | G  | TYRIV | GHWFF | SVFQS | DAHLVLA |
| Streptomyces_coelicolor_1   | RPAHLK | AGVLF  | MGMT | TEKQGG | SDVLSNTT | RAERLE | ..... | G  | TYELT | GHWFF | SVFQS | DAHLVLA |
| Streptomyces_coelicolor_2   | RTPIDK | RGLLA  | MGMT | TEKQGG | SDVLSNTT | RAERLE | ..... | G  | VYTLR | GHWFF | SVFQS | DAHLVLA |
| Streptomyces_avermitilis    | RPAACK | RAGAL  | MGMT | TEKQGG | SDVLSNTT | RAERLE | ..... | G  | TYELT | GHWFF | SVFQS | DAHLVLA |

|                             | 230   | 240                           | 250                                  | 260 | 270 | 280 |
|-----------------------------|-------|-------------------------------|--------------------------------------|-----|-----|-----|
| AidB_E.coli                 | QTA   | .....GGLSCFFVPRFLDGGQRNAIR    | LERLKLKLGNRSNASCEVEFQDAIGWLLGLEEGE   |     |     |     |
| Salmonella_enterica         | QAK   | .....GGLSCFFVPRFLDGGQRNSVR    | LERLKLKLGNRSNASAEVEFQDTVGVWRLGEEGEG  |     |     |     |
| Yersinia_pestis             | QAE   | .....GGLSCFFLPKILFDGTHNAIR    | FERLKLKLGNRSNASAEVEFDNATAWLLGEEGEG   |     |     |     |
| Idiomarina_loihiensis       | QTA   | .....SGLSCFFVPRWRDGGSKNP IQ   | IQQLKQKMGNANASSEVEIRGALGWMVGEKGGK    |     |     |     |
| Acinetobacter_ADP1          | QTS   | .....QEELACFFVPRWLSNGSKNHIE   | IQQLKQKVGNRSNSSSEVEFRDALGIMIGEGRG    |     |     |     |
| Pseudomonas_aeruginosa      | YTD   | .....KGLTCFFLPRRHRDGGSRNQFY   | IQRLKQKLGNRSNASSEVEYRGALAWMVEEGRG    |     |     |     |
| Pseudomonas_fluorescens     | QTD   | .....KGLSCFFLPRRHRDDDRNFY     | IQRLKQKLGNRSNASSEVEFRGALAWMVEEGRG    |     |     |     |
| Pseudomonas_putida          | QTE   | .....KGLSCFFLPRRHRDDRNFY      | IQRLKQKLGNRSNASSEVEFRGALAWMVEEGRG    |     |     |     |
| Pseudomonas_syringae        | QTD   | .....KGLSCFFLPRRHRDDRNFY      | IQRLKQKLGNRSNASSEVEFRGALAWMVEEGRG    |     |     |     |
| Azotobacter_vinelandii      | WSD   | .....GGLSCFFLPRRHRDGGRRNEFY   | IQRLKQKLGNRSNASAEVEYRGALAWMVEEGRG    |     |     |     |
| Chromohalobacter_salexigens | RDE   | .....AGIGCFVPRFRDGGSRNGIL     | LQRLKQKCGNRANASAEVEYADAWAQVIGAPGRG   |     |     |     |
| Chromobacterium_violaceum   | QLR   | .....DGGPSCFFVPRWRDGGSRNAVA   | IQRLKQKVGNRSNASSEVEFHDAWGVIGEPGRG    |     |     |     |
| Burkholderia_cenocepacia    | RTE   | .....AGSPSCFFVPRWRDGTKNAVE    | IQRLKQKVGNRSNSSSEVEFHDAWGVIMLGEGRG   |     |     |     |
| Burkholderia_fungorum       | RTD   | .....HEGLSCFFVPRPFDGGSKNAVQ   | IQRLKQKLGNRSNASSEVEFLDAFGIMIGDEGRG   |     |     |     |
| Burkholderia_pseudomallei_1 | RTAE  | .....QAGISCFFVPRPFDGGSKNAVH   | VQR LKQKLGNRSNASSEVEFLDAFGIMIGDEGRG  |     |     |     |
| Burkholderia_pseudomallei_2 | RTE   | .....AGGPPSCFFVPRWRDGTKNAVR   | IQRLKQKVGNRSNSSSEVEFLDDAWGVMLGEGRG   |     |     |     |
| Ralstonia_solanacearum      | RMGA  | .....EDGPSCFFVPRWRDGGKNPVQ    | IQRLKQKLGNRSNASSEVEFRAAQVIGLIGEAGRG  |     |     |     |
| Ralstonia_eutropha          | RMGA  | .....EDGPSCFFVPRWRDGGKNP IQ   | IQRLKQKLGNRSNSSSEVEFREASGILIGEGRG    |     |     |     |
| Ralstonia_metallidurans_1   | RTE   | .....S.GPACFFVPRYRDGTKNNAVQ   | IQRLKQKVGNRSNSSSEVEFRGAWGRMIGEGRG    |     |     |     |
| Ralstonia_metallidurans_2   | RMGA  | .....ADGPSCFFVPRWRDGGKNP IL   | IQRLKQKLGNRSNSSSEVEFRGTGILIGEGRG     |     |     |     |
| Azoarcus_EbN1               | HSP   | .....AGLSCFFVPRVLDGGSGNGPFR   | FQR LKQKLGNRSNASAEVEFEDAFTGLVGEGRG   |     |     |     |
| Bordetella_parapertussis    | RTD   | .....EGLSCFFVPRWVDGGPRNAVR    | LRR LKQKLGNRSNASAEVEFEQAWGAMLGEGRG   |     |     |     |
| Rhodopseudomonas_palustris  | QAP   | .....GGLSCFFVPRWRDGGKNP LQ    | VLR LKQKMGNANASSEVEFAGAYAQAVGEAGKQ   |     |     |     |
| Brucella_suis               | QTK   | .....EGLSCFFLPRLGKGGESNGFF    | FQR LKQKLGNRSNASSEVEFDGALGCMIGSPGG   |     |     |     |
| Agrobacterium_tumefaciens   | QMG   | .....DGMGCFVPRYLDGGSKNLGH     | FQR LKQKLGNRSNASAEVEFTDAFGYMLGEGSG   |     |     |     |
| Mesorhizobium_loti          | QAP   | .....EGLSCFFVPRVLDGGSGNGPFR   | FQR LKQKLGNRSNASSEVEFVNAIGMIGEGRG    |     |     |     |
| Mesorhizobium_BNCl          | QAE   | .....EGLSCFFLPRLVDDGATNGFR    | FQR LKQKLGNRSNASSEVEFEAGALGYLVGEPGAG |     |     |     |
| Bradyrhizobium_japonicum    | QAD   | .....EGLTCFFMPPRFADGGSVNAIQ   | FQR LKQKLGNRSNASSEVEFAGAYAQAVGEAGKQ  |     |     |     |
| Sinorhizobium_meliloti      | QTR   | .....EGLSCFFLPRLVLDGGAGLRF    | FQR LKQKLGNRSNASSEVEFSDTFCFLLGTPDAG  |     |     |     |
| Mycobacterium_tuberculosis  | QAP   | .....DGLSCFFLPRLVLDGGTRNRF    | LQR LKQKLGNRANASSEVEFSDAVAWLVGEGRG   |     |     |     |
| Nocardia_farcinica          | QAP   | .....GGLSCFFLPRLVLDGGTRNRF    | IQRLKQKLGNRSNASSEVEYENATIGWLVGEPGEG  |     |     |     |
| Streptomyces_coelicolor_1   | RAP   | GGTARAEGNGGLTCFFVPRVLDGGTRNRF | IQRLKQKLGNRSNASAEVEFAGTWARVVGAEGRG   |     |     |     |
| Streptomyces_coelicolor_2   | QAA   | .....GGLSCFFLPRLVLDGGTRNRF    | VQR LKQKLGNRSNASSEVEFDGTVAWLVGEPGEG  |     |     |     |
| Streptomyces_avermitilis    | QASAT | .....DGGGLTCFFVPRVLDGGTRNVFR  | VQR LKQKLGNRSNASSEVEFDGTWARVVDGEGRG  |     |     |     |

|                             | 290      | 300    | 310     | 320      | 330     | 340     | 350                      |               |               |        |      |
|-----------------------------|----------|--------|---------|----------|---------|---------|--------------------------|---------------|---------------|--------|------|
| AidB_E.coli                 | IRLILKMG | GMTFRD | CDALGSH | AMMRR    | AFSLAI  | YHAF    | QRHVFGNPLIQPLMRHVLSRMA   | CLEGQTA       | ALL           |        |      |
| Salmonella_enterica         | IRHILKMG | GMTFRD | CDALGSH | LMRR     | AFSLVAI | YHAF    | HQRCAFQKPLIQPLMRQFLSRMAL | CLEGQTA       | ALL           |        |      |
| Yersinia_pestis             | IRQILKMG | GGYTRF | DCALGSH | LMRR     | AFSVAL  | YHAL    | LQRQVFGKALVQPLMRQVLSRMA  | LEGHTA        | ALL           |        |      |
| Idiomarina_loihiensis       | VRTIIE   | MVAT   | TRDY    | CDMIGSS  | GMRR    | QAVVQAI | HHA                      | SHREAFGTKLSE  | QPLMQNLLADLAL | SEAA   | MTYM |
| Acinetobacter_ADP1          | IPTIIE   | MATY   | TRLT    | CSVGTAIL | RQALVQ  | CIAYTR  | QRRAFGRVLAD              | QPLMQAVLTDMA  | LE            | TEAA   | HLIS |
| Pseudomonas_aeruginosa      | VPTIIE   | MVAM   | TRFDC   | MIGSSAL  | MRQAL   | TQAA    | HHCA                     | YRQVGGRVLSE   | QPLMQNVLADLAL | SEAA   | LAIT |
| Pseudomonas_fluorescens     | VPTIIE   | MVAM   | TRFDC   | MIGSSAL  | MRQAL   | TQAS    | HHCA                     | HRKQVGGKLLSE  | QPLMQNVLADLAL | SEAA   | LALS |
| Pseudomonas_putida          | VPTIIE   | MVAM   | TRFDC   | MIGSSAL  | MRQAL   | TQAA    | HHCA                     | HRKQVGGRVLSE  | QPLMQNVLADLAL | SEAA   | LALS |
| Pseudomonas_syringae        | VPTIIE   | MVAM   | TRFDC   | MIGSSAL  | MRQAL   | TQAT    | HHCA                     | HRVSGRLLSE    | QPLMQNVLADLAL | SEAA   | LALT |
| Azotobacter_vinelandii      | VPTILE   | MVGL   | TRFDC   | MIGSSAL  | MRQAL   | TQAL    | HHCA                     | HLVGGQVLS     | HALMQNVLADLAL | SEAA   | LALT |
| Chromohalobacter_salexigens | IATITL   | DMVQ   | TRLDA   | ATAPAG   | MMRQAL  | REAV    | HHA                      | QGRFAFGKRLAD  | QPLMQVVIADLAL | TEAS   | LALC |
| Chromobacterium_violaceum   | IPTIIE   | MATY   | TRLN    | CVIGSAA  | ILRQ    | LVQAI   | YARR                     | RVAFGKRLAE    | QPLMRNVLADLAL | SEAA   | LCLA |
| Burkholderia_cenocepacia    | IPTIIE   | MATY   | TRLN    | CVIGSAA  | MLRQ    | LVQAI   | YARR                     | RVAFGRALAE    | QPLMRNVLADLAL | SEAA   | LCLA |
| Burkholderia_fungorum       | VPTIIE   | MANY   | TRLD    | CVIGSAA  | LMRA    | LVQAI   | HHAR                     | HRSVAFGRLLAE  | QPLMRNVLADLAL | SEAA   | TVLE |
| Burkholderia_pseudomallei_1 | VPTIIE   | MANY   | TRLD    | CVIGSAA  | LMRA    | LVQAI   | HHAR                     | HRSVAFGRLLAE  | QPLMRNVLADLAL | SEAA   | TVLE |
| Burkholderia_pseudomallei_2 | IPTIIE   | MATY   | TRLN    | CVIGSAA  | ILRQ    | LVQAI   | YARR                     | RVAFGRALAE    | QPLMRNVLADLAL | SEAA   | LALA |
| Ralstonia_solanacearum      | IPTIIE   | MATH   | TRLD    | CVIGSAA  | LLRQ    | LVQAI   | HHAR                     | HRSVAFGRLLAE  | QPLMRNVLADLAL | SQAAT  | LMM  |
| Ralstonia_eutropha          | IPTIIE   | MAT    | STRLD   | CVIGSAA  | ILRQ    | LVQAI   | HHTR                     | HRSVAFGRLLAE  | QPLMRNVLADLAL | SEAA   | LMM  |
| Ralstonia_metallidurans_1   | IPTIIE   | MAT    | STRLD   | CVIGSAA  | ILRQ    | LVQAI   | HHTR                     | HRSVAFGRLLAE  | QPLMRNVLADLAL | SEAA   | LMM  |
| Ralstonia_metallidurans_2   | IPTIIE   | MAT    | STRLD   | CVIGSAA  | LLRQ    | LVQAI   | HHAR                     | HRSVAFGRLLAE  | QPLMRNVLADLAL | SEAA   | LMM  |
| Azoarcus_EbN1               | IATIME   | MAAQ   | TRLD    | CVIGSAA  | LMRR    | LVQAI   | HHAR                     | HRSVAFGRVLA   | QPLMRNVLADLAL | SEVA   | TMLA |
| Bordetella_parapertussis    | TAVLLE   | MAAT   | TRLD    | CVIGSAA  | LLRQ    | VAVQAL  | HHA                      | ACRCAFQGTALAE | QPLMRNVLADLAL | SEAA   | TVIA |
| Rhodopseudomonas_palustris  | VATIIE   | MVAM   | TRFDC   | MIGSSAL  | MRQAL   | TQAS    | DHCR                     | QRAVFGKRLAE   | QPLMQNVLADLAL | TEAA   | LALT |
| Brucella_suis               | VKTIMD   | MVTL   | TRLD    | CAVASA   | LMRS    | GLAEAV  | HHR                      | RRHVFGKPLVE   | QPLMQNVLADMAL | VAGATA | LTS  |
| Agrobacterium_tumefaciens   | VKTILD   | MVTL   | TRLD    | CAVASA   | MMRQ    | GLAEAV  | HFA                      | RGRSVFGKPLVE  | QPLMQNVLADMAL | VAAATA | LTS  |
| Mesorhizobium_loti          | VKTIMD   | MVTL   | TRLD    | CAVASA   | IMRA    | GLAEAV  | HHR                      | RRHVFGKPLVE   | QPLMQNVLADMAL | VAAATA | LTS  |
| Mesorhizobium_BNCl          | IRTIMD   | MVTL   | TRLD    | CAVASA   | LMRR    | GLAEAV  | HHR                      | RRSVFGKPLVE   | QPLMQNVLADMAL | VAAATA | LTS  |
| Bradyrhizobium_japonicum    | IRTIIQ   | MVQL   | TRQD    | CAIASG   | LMRS    | GLAEAV  | HHR                      | RRSVFGKPLVE   | QPLMQNVLADMAL | HVEAS  | VAVL |
| Sinorhizobium_meliloti      | IRTILD   | MVTL   | TRLD    | CAVASA   | MMRQ    | GLAEAV  | HHR                      | RRHVFGKPLVE   | QPLMQNVLADMAL | VAAAS  | LTS  |
| Mycobacterium_tuberculosis  | VPTIIE   | MVNL   | TRLD    | CAVASA   | SMRT    | GLTRAV  | HHA                      | QRKAFGAYLID   | QPLMRNVLADLAL | VEAA   | TIVA |
| Nocardia_farcinica          | VKTIIE   | MVNM   | TRLD    | CVIGSAA  | IMRQ    | ATVAV   | HHR                      | RRSVAFGAKLID  | QPAMRNVLADLAL | VEAA   | TIVM |
| Streptomyces_coelicolor_1   | VPTIID   | MVAA   | TRLD    | CVIGSAA  | LMRQ    | AVQAV   | HHC                      | AYRQVAFGAKLAE | QPLMRNVLADLAL | SEAA   | TILG |
| Streptomyces_coelicolor_2   | VKTIIE   | MVNC   | TRLD    | CVMASA   | LMRK    | LVQAI   | HHR                      | RRVAFGAKLVE   | QPLMRNVLADLAL | SEAA   | TALT |
| Streptomyces_avermitilis    | VRTIIE   | MVAA   | TRLD    | CVIGSAA  | LMRQ    | AVQAI   | HHC                      | TYRQVAFGAKLVE | QPLMRNVLADLAL | SEAA   | TILA |

|                             | 360        | 370         | 380    | 390   | 400    | 410    |        |       |     |     |      |        |      |       |       |       |     |       |       |       |   |   |     |      |     |    |    |       |
|-----------------------------|------------|-------------|--------|-------|--------|--------|--------|-------|-----|-----|------|--------|------|-------|-------|-------|-----|-------|-------|-------|---|---|-----|------|-----|----|----|-------|
| AidB_E.coli                 | FRLARAWDRR | ...ADAK     | EALW   | ARLF  | TPAAK  | FVICKR | GMPFVA | EAM   | EVL | GGT | GYCE | ESEL   | LPRL | LYREM |       |       |     |       |       |       |   |   |     |      |     |    |    |       |
| Salmonella_enterica         | FRLARAWQR  | ...REAK     | EALW   | ARLF  | TPAAK  | FVICKR | GMPFVA | EAM   | EVL | GGT | GYCE | ESEL   | LPRL | LYREM |       |       |     |       |       |       |   |   |     |      |     |    |    |       |
| Yersinia_pestis             | LRLARAWAS  | ...GEVRE    | EQIF   | SRLT  | TPAAK  | FVICKR | GMPFVA | EAM   | EVL | GGT | GYCE | QSEL   | LPRL | LYREM |       |       |     |       |       |       |   |   |     |      |     |    |    |       |
| Idiomarina_loihiensis       | MRIARAMD   | NQ...DDE    | HEKLL  | SRIAT | PIGYW  | ICKRT  | FNHAY  | EAM   | EVL | GGT | GYCE | VMNH   | IMPR | RFRES |       |       |     |       |       |       |   |   |     |      |     |    |    |       |
| Acinetobacter_ADP1          | MHLACACY   | QR...DDD    | ISQAW  | VRLL  | TPAAK  | FVICKR | AVELT  | GEAM  | EVL | GGT | GYCE | VTGIMS | RL   | LFREA |       |       |     |       |       |       |   |   |     |      |     |    |    |       |
| Pseudomonas_aeruginosa      | LRMGHALD   | R...HDE     | QEEKF  | ARLV  | TAVG   | KYWIC  | KRAPAM | INEAM | EVL | GGT | GYCE | VEE    | IL   | LPRL  | LYREA |       |     |       |       |       |   |   |     |      |     |    |    |       |
| Pseudomonas_fluorescens     | LRMGKALD   | H...DDR     | HEAQF  | ARLV  | TAVG   | KYWIC  | KRAPAM | INEAM | EVL | GGT | GYCE | VEDS   | IL   | LPRL  | LYREA |       |     |       |       |       |   |   |     |      |     |    |    |       |
| Pseudomonas_putida          | LRMGKALD   | H...DDP     | QAHF   | ARLV  | TAVG   | KYWIC  | KRAPAM | INEAM | EVL | GGT | GYCE | VEDS   | IL   | LPRL  | LYREA |       |     |       |       |       |   |   |     |      |     |    |    |       |
| Pseudomonas_syringae        | LRVGRALD   | H...DDD     | HEKRF  | VRLV  | TAVG   | KYWIC  | KRAPAM | INEAM | EVL | GGT | GYCE | VEDS   | IV   | PP    | LYREA |       |     |       |       |       |   |   |     |      |     |    |    |       |
| Azotobacter_vinelandii      | LRLARALD   | H...EDE     | SERSL  | ARLV  | TAVG   | KYWIC  | KRAPAM | INEAM | EVL | GGT | GYCE | VEDS   | IL   | LPRL  | LYREA |       |     |       |       |       |   |   |     |      |     |    |    |       |
| Chromohalobacter_salexigens | LRTARAFD   | GAP...DDD   | HERAL  | RLPAL | AKFWH  | KRGPA  | FMAE   | AME   | EVL | GGT | GYCE | VEAP   | LAR  | LYREA |       |       |     |       |       |       |   |   |     |      |     |    |    |       |
| Chromobacterium_violaceum   | ARLAGEF    | END...D...S | PERAW  | KRI   | VTPAAK | FVICKR | AVELT  | GEAM  | EVL | GGT | GYCE | VDDG   | PM   | AR    | LYREA |       |     |       |       |       |   |   |     |      |     |    |    |       |
| Burkholderia_cenocepacia    | MRLADAF    | ERD...D...S | PERAW  | KRI   | VTPAAK | FVICKR | AVELT  | GEAM  | EVL | GGT | GYCE | VDDG   | PM   | AR    | LYREA |       |     |       |       |       |   |   |     |      |     |    |    |       |
| Burkholderia_fungorum       | MRLADAF    | ERD...D...S | PERAW  | KRI   | VTPAAK | FVICKR | AVELT  | GEAM  | EVL | GGT | GYCE | VDDG   | PM   | AR    | LYREA |       |     |       |       |       |   |   |     |      |     |    |    |       |
| Burkholderia_pseudomallei_1 | MRLADAF    | ERD...D...S | PERAW  | KRI   | VTPAAK | FVICKR | AVELT  | GEAM  | EVL | GGT | GYCE | VDDG   | PM   | AR    | LYREA |       |     |       |       |       |   |   |     |      |     |    |    |       |
| Burkholderia_pseudomallei_2 | MRLADAF    | ERD...D...S | PERAW  | KRI   | VTPAAK | FVICKR | AVELT  | GEAM  | EVL | GGT | GYCE | VDDG   | PM   | AR    | LYREA |       |     |       |       |       |   |   |     |      |     |    |    |       |
| Ralstonia_solanacearum      | MALGDAF    | ERA...EAD   | PVAAW  | KRI   | VTPAAK | FVICKR | AVELT  | GEAM  | EVL | GGT | GYCE | VEG    | PM   | AR    | LYREA |       |     |       |       |       |   |   |     |      |     |    |    |       |
| Ralstonia_eutropha          | MELAHAF    | EHA...ETD   | PIAAW  | KRI   | VTPAAK | FVICKR | AVELT  | GEAM  | EVL | GGT | GYCE | VEG    | PM   | AR    | LYREA |       |     |       |       |       |   |   |     |      |     |    |    |       |
| Ralstonia_metallidurans_1   | MRLTEAF    | ALA...DED   | PIQAY  | KRI   | VTPAAK | FVICKR | AVELT  | GEAM  | EVL | GGT | GYCE | YMD    | EG   | PM    | AR    | LYRET |     |       |       |       |   |   |     |      |     |    |    |       |
| Ralstonia_metallidurans_2   | MALAHAF    | EHA...DDD   | PIAAW  | KRI   | VTPAAK | FVICKR | AVELT  | GEAM  | EVL | GGT | GYCE | VEG    | PM   | AR    | LYREA |       |     |       |       |       |   |   |     |      |     |    |    |       |
| Azoarcus_EbN1               | MRLAKAV    | E...DDD     | PIERAW | KRI   | VTPAAK | FVICKR | AVELT  | GEAM  | EVL | GGT | GYCE | VEG    | PM   | AR    | LYREA |       |     |       |       |       |   |   |     |      |     |    |    |       |
| Bordetella_parapertussis    | LRLARAV    | D...ADP     | VARAL  | V     | RVT    | TPAAK  | LWV    | KRA   | I   | AAL | GE   | CE     | EVL  | GGT   | GYCE  | VEAP  | LAR | LYREA |       |       |   |   |     |      |     |    |    |       |
| Rhodopseudomonas_palustris  | MRIARALD   | H...TDE     | HEAL   | IR    | IG     | SAIK   | YWIC   | KRT   | P   | GLT | GE   | AME    | EVL  | GGT   | GYCE  | VEG   | PM  | AR    | LYREA |       |   |   |     |      |     |    |    |       |
| Brucella_suis               | MRLARAF    | D...SDR     | EAAY   | AR    | SMT    | PV     | KYV    | WCK   | I   | A   | P    | A      | L    | L     | Y     | E     | A   | M     | E     | E     | V | L | GGT | GYCE | VEG | PM | AR | LYREA |
| Agrobacterium_tumefaciens   | FRLARAF    | D...NNP     | EAAY   | AR    | SMT    | PV     | KYV    | WCK   | I   | A   | P    | A      | L    | L     | Y     | E     | A   | M     | E     | E     | V | L | GGT | GYCE | VEG | PM | AR | LYREA |
| Mesorhizobium_loti          | FRLARAF    | D...SDR     | EAAY   | AR    | SMT    | PV     | KYV    | WCK   | I   | A   | P    | A      | L    | L     | Y     | E     | A   | M     | E     | E     | V | L | GGT | GYCE | VEG | PM | AR | LYREA |
| Mesorhizobium_BNCl          | FRLARAF    | D...NGR     | EAAY   | AR    | SMT    | PV     | KYV    | WCK   | I   | A   | P    | A      | L    | L     | Y     | E     | A   | M     | E     | E     | V | L | GGT | GYCE | VEG | PM | AR | LYREA |
| Bradyrhizobium_japonicum    | MRLCRAF    | D...HDA     | EAAY   | AR    | SMT    | PV     | KYV    | WCK   | I   | A   | P    | A      | L    | L     | Y     | E     | A   | M     | E     | E     | V | L | GGT | GYCE | VEG | PM | AR | LYREA |
| Sinorhizobium_meliloti      | FRLARAF    | D...SAD     | EAAY   | AR    | SMT    | PV     | KYV    | WCK   | I   | A   | P    | A      | L    | L     | Y     | E     | A   | M     | E     | E     | V | L | GGT | GYCE | VEG | PM | AR | LYREA |
| Mycobacterium_tuberculosis  | MRLACAT    | D...RGN     | ET     | AL    | IR     | IG     | SAIK   | YWIC  | KRT | P   | GLT  | GE     | AME  | EVL   | GGT   | GYCE  | VEG | PM    | AR    | LYREA |   |   |     |      |     |    |    |       |
| Nocardia_farcinica          | MRLACAT    | D...HDP     | EAAN   | LR    | AL     | AV     | KYV    | WCK   | I   | A   | P    | A      | L    | L     | Y     | E     | A   | M     | E     | E     | V | L | GGT | GYCE | VEG | PM | AR | LYREA |
| Streptomyces_coelicolor_1   | LRLAAAD    | ...GGD      | ER     | AL    | RL     | AV     | KYV    | WCK   | I   | A   | P    | A      | L    | L     | Y     | E     | A   | M     | E     | E     | V | L | GGT | GYCE | VEG | PM | AR | LYREA |
| Streptomyces_coelicolor_2   | LRLAAAD    | ...RGE      | GA     | AF    | RL     | AV     | KYV    | WCK   | I   | A   | P    | A      | L    | L     | Y     | E     | A   | M     | E     | E     | V | L | GGT | GYCE | VEG | PM | AR | LYREA |
| Streptomyces_avermitilis    | LRLAAAD    | ...GGE      | ER     | AF    | RL     | AV     | KYV    | WCK   | I   | A   | P    | A      | L    | L     | Y     | E     | A   | M     | E     | E     | V | L | GGT | GYCE | VEG | PM | AR | LYREA |

|                             | 420   | 430    | 440   | 450 | 460 | 470 | 480   |     |    |   |   |   |   |   |   |   |   |   |   |   |   |   |   |   |   |   |   |   |   |   |   |   |   |   |   |   |   |     |   |   |   |   |
|-----------------------------|-------|--------|-------|-----|-----|-----|-------|-----|----|---|---|---|---|---|---|---|---|---|---|---|---|---|---|---|---|---|---|---|---|---|---|---|---|---|---|---|---|-----|---|---|---|---|
| AidB_E.coli                 | PVNSI | WEGSGN | IMCLD | VLR | V   | L   | NKQAG | VYD | LL | S | B | A | F | V | E | V | K | . | G | D | R | Y | F | D | R | A | V | R | R | L | Q | Q | L | R | K | P | A | ... | E | E | L | G |
| Salmonella_enterica         | PVNSI | WEGSGN | IMCLD | VLR | V   | L   | NKQAG | VYD | LL | S | B | A | F | V | E | V | K | . | G | D | R | Y | F | D | R | A | V | R | R | L | Q | Q | L | R | K | P | A | ... | E | E | L | G |
| Yersinia_pestis             | PVNSI | WEGSGN | IMCLD | VLR | V   | L   | NKQAG | VYD | LL | S | B | A | F | V | E | V | K | . | G | D | R | Y | F | D | R | A | V | R | R | L | Q | Q | L | R | K | P | A | ... | E | E | L | G |
| Idiomarina_loihiensis       | PVNAI | WEGSGN | IMCLD | VLR | V   | L   | NKQAG | VYD | LL | S | B | A | F | V | E | V | K | . | G | D | R | Y | F | D | R | A | V | R | R | L | Q | Q | L | R | K | P | A | ... | E | E | L | G |
| Acinetobacter_ADP1          | PVNSI | WEGSGN | IMCLD | VLR | V   | L   | NKQAG | VYD | LL | S | B | A | F | V | E | V | K | . | G | D | R | Y | F | D | R | A | V | R | R | L | Q | Q | L | R | K | P | A | ... | E | E | L | G |
| Pseudomonas_aeruginosa      | PVNSI | WEGSGN | IMCLD | VLR | V   | L   | NKQAG | VYD | LL | S | B | A | F | V | E | V | K | . | G | D | R | Y | F | D | R | A | V | R | R | L | Q | Q | L | R | K | P | A | ... | E | E | L | G |
| Pseudomonas_fluorescens     | PVNSI | WEGSGN | IMCLD | VLR | V   | L   | NKQAG | VYD | LL | S | B | A | F | V | E | V | K | . | G | D | R | Y | F | D | R | A | V | R | R | L | Q | Q | L | R | K | P | A | ... | E | E | L | G |
| Pseudomonas_putida          | PVNSI | WEGSGN | IMCLD | VLR | V   | L   | NKQAG | VYD | LL | S | B | A | F | V | E | V | K | . | G | D | R | Y | F | D | R | A | V | R | R | L | Q | Q | L | R | K | P | A | ... | E | E | L | G |
| Pseudomonas_syringae        | PVNSI | WEGSGN | IMCLD | VLR | V   | L   | NKQAG | VYD | LL | S | B | A | F | V | E | V | K | . | G | D | R | Y | F | D | R | A | V | R | R | L | Q | Q | L | R | K | P | A | ... | E | E | L | G |
| Azotobacter_vinelandii      | PVNSI | WEGSGN | IMCLD | VLR | V   | L   | NKQAG | VYD | LL | S | B | A | F | V | E | V | K | . | G | D | R | Y | F | D | R | A | V | R | R | L | Q | Q | L | R | K | P | A | ... | E | E | L | G |
| Chromobacterium_violaceum   | PVNSI | WEGSGN | IMCLD | VLR | V   | L   | NKQAG | VYD | LL | S | B | A | F | V | E | V | K | . | G | D | R | Y | F | D | R | A | V | R | R | L | Q | Q | L | R | K | P | A | ... | E | E | L | G |
| Burkholderia_cenocepacia    | PVNSI | WEGSGN | IMCLD | VLR | V   | L   | NKQAG | VYD | LL | S | B | A | F | V | E | V | K | . | G | D | R | Y | F | D | R | A | V | R | R | L | Q | Q | L | R | K | P | A | ... | E | E | L | G |
| Burkholderia_fungorum       | PVNSI | WEGSGN | IMCLD | VLR | V   | L   | NKQAG | VYD | LL | S | B | A | F | V | E | V | K | . | G | D | R | Y | F | D | R | A | V | R | R | L | Q | Q | L | R | K | P | A | ... | E | E | L | G |
| Burkholderia_pseudomallei_1 | PVNSI | WEGSGN | IMCLD | VLR | V   | L   | NKQAG | VYD | LL | S | B | A | F | V | E | V | K | . | G | D | R | Y | F | D | R | A | V | R | R | L | Q | Q | L | R | K | P | A | ... | E | E | L | G |
| Burkholderia_pseudomallei_2 | PVNSI | WEGSGN | IMCLD | VLR | V   | L   | NKQAG | VYD | LL | S | B | A | F | V | E | V | K | . | G | D | R | Y | F | D | R | A | V | R | R | L | Q | Q | L | R | K | P | A | ... | E | E | L | G |
| Ralstonia_solanacearum      | PVNSI | WEGSGN | IMCLD | VLR | V   | L   | NKQAG | VYD | LL | S | B | A | F | V | E | V | K | . | G | D | R | Y | F | D | R | A | V | R | R | L | Q | Q | L | R | K | P | A | ... | E | E | L | G |
| Ralstonia_eutropha          | PVNSI | WEGSGN | IMCLD | VLR | V   | L   | NKQAG | VYD | LL | S | B | A | F | V | E | V | K | . | G | D | R | Y | F | D | R | A | V | R | R | L | Q | Q | L | R | K | P | A | ... | E | E | L | G |
| Ralstonia_metallidurans_1   | PVNSI | WEGSGN | IMCLD | VLR | V   | L   | NKQAG | VYD | LL | S | B | A | F | V | E | V | K | . | G | D | R | Y | F | D | R | A | V | R | R | L | Q | Q | L | R | K | P | A | ... | E | E | L | G |
| Ralstonia_metallidurans_2   | PVNSI | WEGSGN | IMCLD | VLR | V   | L   | NKQAG | VYD | LL | S | B | A | F | V | E | V | K | . | G | D | R | Y | F | D | R | A | V | R | R | L | Q | Q | L | R | K | P | A | ... | E | E | L | G |
| Azoarcus_EbN1               | PVNSI | WEGSGN | IMCLD | VLR | V   | L   | NKQAG | VYD | LL | S | B | A | F | V | E | V | K | . | G | D | R | Y | F | D | R | A | V | R | R | L | Q | Q | L | R | K | P | A | ... | E | E | L | G |
| Bordetella_parapertussis    | PVNSI | WEGSGN | IMCLD | VLR | V   | L   | NKQAG | VYD | LL | S | B | A | F | V | E | V | K | . | G | D | R | Y | F | D | R | A | V | R | R | L | Q | Q | L | R | K | P | A | ... | E | E | L | G |
| Rhodopseudomonas_palustris  | PVNAI | WEGSGN | IMCLD | VLR | V   | L   | NKQAG | VYD | LL | S | B | A | F | V | E | V | K | . | G | D | R | Y | F | D | R | A | V | R | R | L | Q | Q | L | R | K | P | A | ... | E | E | L | G |
| Brucella_suis               | PVNSI | WEGSGN | IMCLD | VLR | V   | L   | NKQAG | VYD | LL | S | B | A | F | V | E | V | K | . | G | D | R | Y | F | D | R | A | V | R | R | L | Q | Q | L | R | K | P | A | ... | E | E | L | G |
| Agrobacterium_tumefaciens   | PVNSI | WEGSGN | IMCLD | VLR | V   | L   | NKQAG | VYD | LL | S | B | A | F | V | E | V | K | . | G | D | R | Y | F | D | R | A | V | R | R | L | Q | Q | L | R | K | P | A | ... | E | E | L | G |
| Mesorhizobium_loti          | PVNSI | WEGSGN | IMCLD | VLR | V   | L   | NKQAG | VYD | LL | S | B | A | F | V | E | V | K | . | G | D | R | Y | F | D | R | A | V | R | R | L | Q | Q | L | R | K | P | A | ... | E | E | L | G |
| Mesorhizobium_BNCl          | PVNSI | WEGSGN | IMCLD | VLR | V   | L   | NKQAG | VYD | LL | S | B | A | F | V | E | V | K | . | G | D | R | Y | F | D | R | A | V | R | R | L | Q | Q | L | R | K | P | A | ... | E | E | L | G |
| Bradyrhizobium_japonicum    | PVNSI | WEGSGN | IMCLD | VLR | V   | L   | NKQAG | VYD | LL | S | B | A | F | V | E | V | K | . | G | D | R | Y | F | D | R | A | V | R | R | L | Q | Q | L | R | K | P | A | ... | E | E | L | G |
| Sinorhizobium_meliloti      | PVNSI | WEGSGN | IMCLD | VLR | V   | L   | NKQAG | VYD | LL | S | B | A | F | V | E | V | K | . | G | D | R | Y | F | D | R | A | V | R | R | L | Q | Q | L | R | K | P | A | ... | E | E | L | G |
| Mycobacterium_tuberculosis  | PLMSI | WEGSGN | IMCLD | VLR | V   | L   | NKQAG | VYD | LL | S | B | A | F | V | E | V | K | . | G | D | R | Y | F | D | R | A | V | R | R | L | Q | Q | L | R | K | P | A | ... | E | E | L | G |
| Nocardia_farcinica          | PLMSI | WEGSGN | IMCLD | VLR | V   | L   | NKQAG | VYD | LL | S | B | A | F | V | E | V | K |   |   |   |   |   |   |   |   |   |   |   |   |   |   |   |   |   |   |   |   |     |   |   |   |   |

|                             | 490       | 500         | 510        | 520       | 530              | 540             |               |
|-----------------------------|-----------|-------------|------------|-----------|------------------|-----------------|---------------|
| AidE_E_coli                 | REITHQLFL | LGCFAQMLK   | YASPPMA    | AWCQVML   | DT...RGGVRLS     | QI.....QNDLL    | IRATGGVGV     |
| Salmonella_enterica         | REITQQLFL | LGCFAEMLR   | HASPPLA    | AWCQML    | DT...RGEMPLP     | QV.....QNDLL    | IRATGGGLR     |
| Yersinia_pestis             | RALTQQLFD | LCCASQLDR   | FASPRLA    | AWCRM     | LDH...RDQYMLP    | AV.....CARLL    | IRATGAH..     |
| Idiomarina_loihiensis       | RSITDSMAV | GLCAALLV    | QHAGTDV    | DAFCASRL  | AA...STGLNYG     | TLP.TGLNC.AA    | IVERASPAQAQ   |
| Acinetobacter_ADPI          | RHFVSRVLV | LITCAVLM    | RRYAPHWVS  | DAFIQSRYG | T...WHGRVTG      | TLP.VMP.DSKL    | ILERRAYPE..   |
| Pseudomonas_aeruginosa      | RQLTEVVAI | ALCAKLLLE   | EAGNSAVS   | DAFIGSRL  | GD...G.GRVYG     | TLP.RGVEV.EA    | LLARATPHLT.   |
| Pseudomonas_fluorescens     | RQLTEVVAI | ALCAKLLLE   | EAGNSAVS   | DAFIGSRL  | SG...G.GRVYG     | TLP.RGLDV.EA    | IVARSTPQGF.   |
| Pseudomonas_putida          | RQLTEVVAI | ALCAKLLLE   | EAGNADVS   | DAFIGSRL  | AG...G.GRVYG     | TLP.RGVNV.MA    | LVTRATPAWPL   |
| Pseudomonas_syringae        | RQLTEVVAI | ALCAKLLLE   | EAGNAAVS   | DAFIGSRL  | AS...G.GRVYG     | TLP.TGLDV.ET    | LLORSSPOVA.   |
| Azotobacter_vinelandii      | RRLVEVAVL | AVLCAKLLLE  | EAGNAAVS   | DAFIHSRL  | GE...G.GRVYG     | TLP.RGLDV.AG    | LLARSAPQFG.   |
| Chromohalobacter_salexigens | RWLTQRLAQ | CECAALLR    | HAFNAVGS   | TECTARL   | GD...EATPLFG     | VLP.AQAPL.AA    | LLARINP....   |
| Chromobacterium_violaceum   | RRFAQLLAL | TVGCLLR     | GRAPAAVA   | DGFIASRL  | ADG...LWGRVAG    | ALD.ARAAGADY    | LLERALPAA..   |
| Burkholderia_cenocepacia    | RVFAQR    | LAVVAACLL   | RRDAPAAVS  | DAFVATRL  | AAP...DWGRIAG    | CFD.PHAIDVAA    | LLORAYPA...   |
| Burkholderia_fungorum       | RRIAQVVL  | IACATLLLE   | HAPAEVA    | DAFIATRL  | ADGCGESGR        | VYGTLP.ATPDH.AA | IVERAFPA...   |
| Burkholderia_pseudomallei_1 | RRIAQR    | IALLVACAS   | LLDRDGPYVA | DAFVATRF  | GHDSSETGR        | VGTLP.ATIDH.AA  | IVERAFPA...   |
| Burkholderia_pseudomallei_2 | RVLAQR    | IALLVACAS   | LLSDAAPAVS | DGFIATRF  | GEP...AWGRVTG    | ALD.ARRVDAAA    | LLORAYAA...   |
| Ralstonia_solanacearum      | RRIAQQLAL | TACAAALML   | LAHADA     | DAFERIASR | HH...QHGRVFG     | TLP.GNAQELGA    | ALLORAWPA...  |
| Ralstonia_eutropha          | RRFAQLV   | LVTACAAALML | LAHADA     | ENAFVASRL | GR...QHGRVFG     | TLP.MEPEVLKR    | VFERGWTA...   |
| Ralstonia_metallidurans_1   | RRHAQLV   | LVLVCAARLL  | GEHAPAAV   | DAFISRF   | DA...QWGRVFG     | MPLD.DGVAAHA    | ILLDRAWTQ...  |
| Ralstonia_metallidurans_2   | RRFAQLV   | LVTACAAALML | IAGNAE     | SAAALFV   | ASRLGR...QHGRVFG | TLP.ADASTLAR    | ILARAWPA...   |
| Azoarcus_EbN1               | RHVAMQLV  | LVLVCAARLL  | RRHAPGNV   | AAAFIDSRF | DR...PAGQVP      | GILT..KP.DATT   | LLDRAWWPG...  |
| Bordetella_parapertussis    | RRVAAQLAT | LWCAALLR    | HAPAVGAA   | FAATRL    | HA...PAG.IVG     | AAP.ID..DPAP    | ILLARAWPGIC.  |
| Rhodopseudomonas_palustris  | RDLVDR    | LAVGLCASV   | LIRHAPDEVA | EAYCASRL  | LAQ...RGAHHYG    | ALP.KGVNF.AA    | ILLDRAWPR...  |
| Brucella_suis               | RLLTEQLAF | AAAAAELR    | QLGADDI    | AFIETRL   | GG...QWRTTYG     | MLD.ARHNA.MR    | IIDQLYPAS..   |
| Agrobacterium_tumefaciens   | RLLVEQFAL | AAAAAELCR   | LGAGKIA    | DAFLETRL  | AG...GWRHTYG     | MLD.SREDF.NY    | IIDLLYPAS.    |
| Mesorhizobium_lot1          | RLLTEQLAL | SAAAAELRR   | LGAGRIA    | DAFVETRL  | AG...QWRNTYG     | MID.SRHDA.RM    | IIDTLYPVN.    |
| Mesorhizobium_BNC1          | RLLTEQLAL | SAAAAELKR   | LGAGQVAD   | DAFIETRL  | AG...QWRGTYG     | MID.ARYDA.VA    | ILLDMLYPEAM.  |
| Bradyrhizobium_japonicum    | RLAVEKLAL | LAAAAALNG   | VSP.RHAE   | LFAATRL   | AT...THASMYG     | AVELESQDV.RA    | LLERALP....   |
| Sinorhizobium_meliloti      | RMLVEQLAL | LAAAAAELYR  | LGAGRIA    | DAFLESRL  | AA...GWRSTYG     | MLD.SRFPD.AY    | VILLDLYPAAT.  |
| Mycobacterium_tuberculosis  | RKIAEDICL | AELCGSLL    | VRHGHPAVA  | DAFATRL   | GG...QWGGAYG     | MP.AGLDL.AP     | ILLERALLVKG.. |
| Nocardia_farcinica          | RRVVELMAL | VLCGAQLVR   | HGHRAVA    | DAFCATRL  | GD...DWGIAPG     | TLP.TGVDT.ES    | ILERRAFVE...  |
| Streptomyces_coelicolor_1   | RLLAERLAL | VLCGALLVR   | YAPPEVA    | DAFCASRL  | GG...DGGAAF      | GTLPTLTL.AA     | VVERARPVV..   |
| Streptomyces_coelicolor_2   | RRLVEMLAL | TLCASLLVR   | HAPPAVA    | DAFCATRL  | GG...DWGHAF      | GTLPTADL.DG     | ILLTRALPPEG.  |
| Streptomyces_avermitilis    | RRVVERLAL | VLCGALLVR   | YAPPEVA    | DAFCASRL  | GG...DWGTAF      | GTLPHSLDL.AT    | VVERARPVVA..  |
